# Supplementary material for: Use of diagnostic coronary angiography in women and men presenting with acute myocardial infarction: a matched cohort study
Source: Springer Nature journal article supplement (doi:10.1186/s12872-016-0248-9), 2016-06-01
Supplement: MOESM1 [file 10243524]

| <b>Data</b>                                      | <b>Patient 1</b> | <b>Patient 2</b> | <b>Patient 3</b> | <b>Patient 4</b> | <b>Patient 5</b> |
|--------------------------------------------------|------------------|------------------|------------------|------------------|------------------|
| 1) Index admission                               |                  |                  |                  |                  |                  |
| Personal civil registration number               |                  |                  |                  |                  |                  |
| Date of index admission                          |                  |                  |                  |                  |                  |
| Sex                                              |                  |                  |                  |                  |                  |
| Age                                              |                  |                  |                  |                  |                  |
| Index hospital                                   |                  |                  |                  |                  |                  |
| Way of admission                                 |                  |                  |                  |                  |                  |
| If transferred: Date of first admission          |                  |                  |                  |                  |                  |
| Diagnostic coronary angiography (DCA) performed? |                  |                  |                  |                  |                  |
| Date for DCA                                     |                  |                  |                  |                  |                  |
| Indication for DCA                               |                  |                  |                  |                  |                  |
| Admission diagnosis                              |                  |                  |                  |                  |                  |
| Working diagnosis of acute coronary syndrome?    |                  |                  |                  |                  |                  |
| If no, then what diagnosis?                      |                  |                  |                  |                  |                  |
| Time from presentation to admission              |                  |                  |                  |                  |                  |
| Procedure before index admission?                |                  |                  |                  |                  |                  |
| DCA?                                             |                  |                  |                  |                  |                  |
| Date for DCA                                     |                  |                  |                  |                  |                  |
| PCI?                                             |                  |                  |                  |                  |                  |
| Date for PCI                                     |                  |                  |                  |                  |                  |
| CABG?                                            |                  |                  |                  |                  |                  |
| Date for CABG                                    |                  |                  |                  |                  |                  |
| DCA performed at this admission?                 |                  |                  |                  |                  |                  |
| Date for DCA                                     |                  |                  |                  |                  |                  |
| DCA declination by patient?                      |                  |                  |                  |                  |                  |
| DCA deemed contraindicated by physician?         |                  |                  |                  |                  |                  |
| Reason/why?                                      |                  |                  |                  |                  |                  |
| Final primary diagnosis                          |                  |                  |                  |                  |                  |
| Ongoing pregnancy                                |                  |                  |                  |                  |                  |
|                                                  |                  |                  |                  |                  |                  |
| 2) Risk factors                                  |                  |                  |                  |                  |                  |
| Family history of cardiovascular disease         |                  |                  |                  |                  |                  |
| Hypertension                                     |                  |                  |                  |                  |                  |
| Diabetes mellitus                                |                  |                  |                  |                  |                  |
| Hypercholesterolaemia                            |                  |                  |                  |                  |                  |
| Smoking                                          |                  |                  |                  |                  |                  |
| Prior percutaneous intervention (PCI)            |                  |                  |                  |                  |                  |
| Prior Coronary artery bypass                     |                  |                  |                  |                  |                  |

|                                                |  |  |  |  |  |
|------------------------------------------------|--|--|--|--|--|
| graft (CABG)                                   |  |  |  |  |  |
| Prior myocardial infarction (MI)               |  |  |  |  |  |
|                                                |  |  |  |  |  |
| 3) Comorbidities                               |  |  |  |  |  |
| Known ischemic heart disease                   |  |  |  |  |  |
| Heart failure                                  |  |  |  |  |  |
| Valvular disease                               |  |  |  |  |  |
| Atrial Fibrillation                            |  |  |  |  |  |
| Peripheral arterial occlusive Disease (COPD)   |  |  |  |  |  |
| Peripheral arterial occlusive Disease (PAOD)   |  |  |  |  |  |
| Renal failure                                  |  |  |  |  |  |
| Neoplasia                                      |  |  |  |  |  |
| Liver failure                                  |  |  |  |  |  |
| Stroke                                         |  |  |  |  |  |
| Known contrast-allergy                         |  |  |  |  |  |
| NYHA class                                     |  |  |  |  |  |
| Terminal comorbid condition                    |  |  |  |  |  |
|                                                |  |  |  |  |  |
| 4) Electronic electrocardiogram (ECG) findings |  |  |  |  |  |
| ST-elevations                                  |  |  |  |  |  |
| ST-depressions                                 |  |  |  |  |  |
| Left bundle branch block (LBBB)                |  |  |  |  |  |
| Q-wave                                         |  |  |  |  |  |
|                                                |  |  |  |  |  |
| 5) Clinical presentation                       |  |  |  |  |  |
| Chest pain                                     |  |  |  |  |  |
| Dyspnea                                        |  |  |  |  |  |
| Neck pain                                      |  |  |  |  |  |
| Diaphoresis                                    |  |  |  |  |  |
| Nausea                                         |  |  |  |  |  |
| Fatigue                                        |  |  |  |  |  |
| Abdominal pain                                 |  |  |  |  |  |
| Back pain                                      |  |  |  |  |  |
| Cardiac arrest                                 |  |  |  |  |  |
| Other competing acute conditions at admission  |  |  |  |  |  |
| If yes, which?                                 |  |  |  |  |  |
| Ongoing bleeding                               |  |  |  |  |  |
| Where?                                         |  |  |  |  |  |
| Systolic blood-pressure                        |  |  |  |  |  |
| Diastolic blood-pressure                       |  |  |  |  |  |
| Heart rate                                     |  |  |  |  |  |
| Respiratory rate                               |  |  |  |  |  |
| Temperature                                    |  |  |  |  |  |
| Blood saturation                               |  |  |  |  |  |

|                                      |  |  |  |  |  |
|--------------------------------------|--|--|--|--|--|
| Body mass index                      |  |  |  |  |  |
| Dependent oedema                     |  |  |  |  |  |
| Pulmonary oedema                     |  |  |  |  |  |
| Neck vein distension                 |  |  |  |  |  |
|                                      |  |  |  |  |  |
| 6) In-hospital medication            |  |  |  |  |  |
| Digoxin treatment                    |  |  |  |  |  |
| Metformin treatment                  |  |  |  |  |  |
|                                      |  |  |  |  |  |
| 7) Blood test results                |  |  |  |  |  |
| Hemoglobin                           |  |  |  |  |  |
| White blood-cell count (WBC)         |  |  |  |  |  |
| Upper ref. WBC                       |  |  |  |  |  |
| Thrombocytes                         |  |  |  |  |  |
| Lower ref. thrombocytes              |  |  |  |  |  |
| Upper ref. Thrombocytes              |  |  |  |  |  |
| Creatinine                           |  |  |  |  |  |
| Upper ref. Creatinine                |  |  |  |  |  |
| Potassium level                      |  |  |  |  |  |
| Upper ref. Potassium                 |  |  |  |  |  |
| Lower ref. Potassium                 |  |  |  |  |  |
| Troponine concentration I            |  |  |  |  |  |
| Troponine concentration II           |  |  |  |  |  |
| Troponine concentration III          |  |  |  |  |  |
| Upper ref. Troponine                 |  |  |  |  |  |
| Troponine I                          |  |  |  |  |  |
| CKMB concentration I                 |  |  |  |  |  |
| CKMB concentration II                |  |  |  |  |  |
| CKMB concentration III               |  |  |  |  |  |
| Upper ref. CKMB                      |  |  |  |  |  |
| International normalised ratio (INR) |  |  |  |  |  |
