# Supplementary material for: Use of diagnostic coronary angiography in women and men presenting with acute myocardial infarction: a matched cohort study
Source: Springer Nature journal article supplement (doi:10.1186/s12872-016-0248-9), 2016-06-01
Supplement: MOESM2 [file 10243524]

**Table S1**

| <b>Gender difference in the invasive investigation of AMI patients</b> |            |                      |            |            |                  |            |            |
|------------------------------------------------------------------------|------------|----------------------|------------|------------|------------------|------------|------------|
|                                                                        | Denmark    | Capital area/region* | Men        | Women      | Study Population | Men        | Women      |
| <i>No. of patients</i>                                                 | 11 418     | 4000                 | 2641       | 1359       | 500              | 250        | 250        |
| <i>Age, median (IQR)</i>                                               | 68 (58-78) | 66 (57-77)           | 64 (55-73) | 73 (62-82) | 74 (62-81)       | 74 (62-81) | 74 (62-81) |
| Women, %                                                               | 35.6       | 34.0                 | -          | -          | 50.0             | -          | -          |
| AMI diagnosis                                                          |            |                      |            |            |                  |            |            |
| STEMI                                                                  | 41.8       | 36.0                 | 39.6       | 29.2       | 30.2             | 31.2       | 29.2       |
| NSTEMI                                                                 | 31.2       | 37.0                 | 35.9       | 39.1       | 39.6             | 39.2       | 40.0       |
| AMI unspecified                                                        | 27.0       | 27.0                 | 24.5       | 31.7       | 30.2             | 29.6       | 30.8       |
| <i>Admission to center, %</i>                                          | 44.6       | 49.9                 | 53.4       | 43.1       | 44.8             | 46.0       | 43.6       |
| <i>Duration of admission (days)</i>                                    | 4 (3-6)    | 4 (3-6)              | 4 (3-6)    | 5 (3-6)    | 5 (3-6)          | 5 (3-6)    | 5 (3-7)    |
| <i>KAG within 60 days, %</i>                                           | 78.9       | 81.8                 | 85.7       | 74.0       | 73.8             | 76.4       | 71.2       |
| <i>Death within 60 days, %</i>                                         | 8.5        | 7.5                  | 6.0        | 10.4       | 10.2             | 10.4       | 10.0       |

*Italic lines are propensity score matched variables*

*\*The greater metropolitan area surrounding Copenhagen*
