# Supplementary material for: Use of diagnostic coronary angiography in women and men presenting with acute myocardial infarction: a matched cohort study
Source: Springer Nature journal article supplement (doi:10.1186/s12872-016-0248-9), 2016-06-01
Supplement: MOESM3 [file 10243524]

**Table S2**

| <b>n(%)</b>                   | <b>All</b> | <b>Women</b> | <b>Men</b> | <b>p-value</b> |
|-------------------------------|------------|--------------|------------|----------------|
| <b>DCA</b>                    |            |              |            |                |
| 1. quartile (age 33-62 years) | 120 (95.2) | 57 (90.5)    | 63 (100)   | 0.012          |
| 2. quartile (age 63-75 years) | 120 (90.9) | 60 (90.9)    | 60 (90.9)  | 1.00           |
| 3. quartile (age 76-82 years) | 99 (77.3)  | 49 (76.6)    | 50 (78.1)  | 0.83           |
| 4. quartile (age 83-90 years) | 46 (40.7)  | 25 (43.9)    | 21 (37.5)  | 0.49           |
| <b>Death within 60 days</b>   |            |              |            |                |
| 1. quartile (age 33-62 years) | 2 (1.6)    | 1 (1.6)      | 1 (1.6)    | 1.00           |
| 2. quartile (age 63-75 years) | 8 (6.1)    | 4 (6.1)      | 4 (6.1)    | 1.00           |
| 3. quartile (age 76-82 years) | 13 (10.2)  | 7 (10.9)     | 6 (9.4)    | 0.77           |
| 4. quartile (age 83-90 years) | 27 (23.7)  | 14 (24.6)    | 13 (22.8)  | 0.83           |

*All numbers are counts (%)*
